# Supplementary material for: Regulating the selective adsorption of OH* over the equatorial position of Co3O4via doping of Ru ions for efficient water oxidation reaction
Source: Royal Society of Chemistry journal article supplement (doi:10.1039/d3ta03822j), 2023-01-01
Supplement: d3ta03822j1.pdf [file d3ta03822j1.pdf]

# **Regulating the selective adsorption of OH\* over equatorial position of Co<sub>3</sub>O<sub>4</sub> via doping of Ru ions for efficient water oxidation reaction**

**Ragunath Madhu,<sup>a,b</sup> Arun Karmakar,<sup>a,b</sup> Preethi Arunachalam,<sup>c,#</sup> Jaisakthi**

**Muthukumar,<sup>c,#</sup> Pradeep Gudlur<sup>d</sup> and Subrata Kundu<sup>a,b,\*</sup>**

*<sup>a</sup>Academy of Scientific and Innovative Research (AcSIR), Ghaziabad-201002, India.*

*<sup>b</sup>Electrochemical Process Engineering (EPE) Division, CSIR-Central Electrochemical Research Institute (CECRI), Karaikudi-630003, Tamil Nadu, India.*

*<sup>c</sup>Centre for Education (CFE), CSIR-Central Electrochemical Research Institute (CECRI), Karaikudi 630 003, Tamil Nadu, India.*

*<sup>d</sup>Department of Mechanical Engineering, Union College, 807 Union Street Schenectady, NY, 12308, USA.*

*\*To whom correspondence should be addressed, E-mail: [skundu@cecri.res.in](mailto:skundu@cecri.res.in); [kundu.subrata@gmail.com](mailto:kundu.subrata@gmail.com). Phone/Fax: (+ 91) 4565-241487.*

This file contains 34 pages in which the information on reagents and instruments used in the study, electrochemical measurements, surface charge determination, XRD, XPS, BET and other electrochemical calculations like ECSA, C<sub>dl</sub> values, etc., comparison table, references are given respectively.

**Number of Figures: 14 (S1-S14)**

**Number of Tables: 4 (S1-S4)**

| <b>Figures &amp; tables</b> | <b>Subject of the Figure</b>                                                                                                                                                                                                                                                            | <b>Page number</b> |
|-----------------------------|-----------------------------------------------------------------------------------------------------------------------------------------------------------------------------------------------------------------------------------------------------------------------------------------|--------------------|
| <b>S1</b>                   | PXRD pattern of Co-BTC                                                                                                                                                                                                                                                                  | <b>S9</b>          |
| <b>S2</b>                   | Deconvoluted O 1s XPS spectra of Co <sub>3</sub> O <sub>4</sub> , Ru-Co <sub>3</sub> O <sub>4</sub> 10, Ru-Co <sub>3</sub> O <sub>4</sub> 15 and Ru-Co <sub>3</sub> O <sub>4</sub> 20.                                                                                                  | <b>S10</b>         |
| <b>S3</b>                   | N <sub>2</sub> adsorption-desorption of Co <sub>3</sub> O <sub>4</sub> , Ru-Co <sub>3</sub> O <sub>4</sub> 10, Ru-Co <sub>3</sub> O <sub>4</sub> 15 and Ru-Co <sub>3</sub> O <sub>4</sub> 20 respectively.                                                                              | <b>S11</b>         |
| <b>S4</b>                   | LSV polarization result of commercial RuO <sub>2</sub> in 1 M KOH electrolyte.                                                                                                                                                                                                          | <b>S12</b>         |
| <b>S5</b>                   | CVs recorded at non-faradaic region at a different scan rate for Co <sub>3</sub> O <sub>4</sub> , Ru-Co <sub>3</sub> O <sub>4</sub> 10, Ru-Co <sub>3</sub> O <sub>4</sub> 15 and Ru-Co <sub>3</sub> O <sub>4</sub> 20 respectively in 1 M KOH electrolyte.                              | <b>S13</b>         |
| <b>S6</b>                   | ECSA normalized and mass dependent activity of Co <sub>3</sub> O <sub>4</sub> , Ru-Co <sub>3</sub> O <sub>4</sub> 10, Ru-Co <sub>3</sub> O <sub>4</sub> 15 and Ru-Co <sub>3</sub> O <sub>4</sub> 20 respectively in 1 M KOH.                                                            | <b>S14</b>         |
| <b>S7</b>                   | Operando Nyquist plot of Co <sub>3</sub> O <sub>4</sub> , Ru-Co <sub>3</sub> O <sub>4</sub> 10, Ru-Co <sub>3</sub> O <sub>4</sub> 15 and Ru-Co <sub>3</sub> O <sub>4</sub> 20 respectively                                                                                              | <b>S15</b>         |
| <b>S8</b>                   | Faradaic efficiency (FE) of the Ru-Co <sub>3</sub> O <sub>4</sub> 15 electrocatalyst for OER in 1 M KOH solution.                                                                                                                                                                       | <b>S16</b>         |
| <b>S9</b>                   | LSV polarization curves of Ru-Co <sub>3</sub> O <sub>4</sub> 15 after 1000 continuous CV cycles in 1 M KOH solution and corresponding EIS analysis.                                                                                                                                     | <b>S17</b>         |
| <b>S10</b>                  | Redox feature of Co <sub>3</sub> O <sub>4</sub> , Ru-Co <sub>3</sub> O <sub>4</sub> 10, Ru-Co <sub>3</sub> O <sub>4</sub> 15 and Ru-Co <sub>3</sub> O <sub>4</sub> 20 respectively measured at 100 mV/s.                                                                                | <b>S18</b>         |
| <b>S11</b>                  | LSV polarization result of commercial RuO <sub>2</sub> in 0.5 M H <sub>2</sub> SO <sub>4</sub> electrolyte.                                                                                                                                                                             | <b>S19</b>         |
| <b>S12</b>                  | CVs recorded at non-faradaic region at a different scan rate for Co <sub>3</sub> O <sub>4</sub> , Ru-Co <sub>3</sub> O <sub>4</sub> 10, Ru-Co <sub>3</sub> O <sub>4</sub> 15 and Ru-Co <sub>3</sub> O <sub>4</sub> 20 respectively in 0.5 M H <sub>2</sub> SO <sub>4</sub> electrolyte. | <b>S20</b>         |
| <b>S13</b>                  | ECSA normalized and mass dependent activity of Co <sub>3</sub> O <sub>4</sub> , Ru-Co <sub>3</sub> O <sub>4</sub> 10, Ru-Co <sub>3</sub> O <sub>4</sub> 15 and Ru-Co <sub>3</sub> O <sub>4</sub> 20 respectively in 0.5 M H <sub>2</sub> SO <sub>4</sub>                                | <b>S21</b>         |
| <b>S14</b>                  | LSV polarization curves of Ru-Co <sub>3</sub> O <sub>4</sub> 15 after 1000 continuous CV cycles in 0.5 M H <sub>2</sub> SO <sub>4</sub> solution and corresponding EIS analysis.                                                                                                        | <b>S22</b>         |
| <b>S15</b>                  | Post XRD analysis of Ru-Co <sub>3</sub> O <sub>4</sub> 15                                                                                                                                                                                                                               | <b>S23</b>         |
| <b>S16</b>                  | Post Raman analysis of Ru-Co <sub>3</sub> O <sub>4</sub> 15 in 0.5 M H <sub>2</sub> SO <sub>4</sub> solution                                                                                                                                                                            | <b>S24</b>         |
| <b>S17</b>                  | Post XPS analysis of Ru-Co <sub>3</sub> O <sub>4</sub> 15                                                                                                                                                                                                                               | <b>S25</b>         |
| <b>S18</b>                  | Post HR-TEM analysis of Ru-Co <sub>3</sub> O <sub>4</sub> 15 in 1 M KOH solution                                                                                                                                                                                                        | <b>S26</b>         |
| <b>S19</b>                  | Post HR-TEM analysis of Ru-Co <sub>3</sub> O <sub>4</sub> 15 in 0.5 M H <sub>2</sub> SO <sub>4</sub> electrolyte                                                                                                                                                                        | <b>S27</b>         |
| <b>S20</b>                  | Optimized electronic structure of Co <sub>3</sub> O <sub>4</sub> and Ru-Co <sub>3</sub> O <sub>4</sub>                                                                                                                                                                                  | <b>S28</b>         |
| <b>S21</b>                  | Determination of bond length before and after doping of Ru towards Co <sub>3</sub> O <sub>4</sub> respectively.                                                                                                                                                                         | <b>S29</b>         |
| <b>Table S1</b>             | TOF values calculated at 350 and 370 mV overpotential for Co <sub>3</sub> O <sub>4</sub> and                                                                                                                                                                                            | <b>S30</b>         |

|                 |                                                                                                                                                                                          |            |
|-----------------|------------------------------------------------------------------------------------------------------------------------------------------------------------------------------------------|------------|
|                 | various Ru-Co <sub>3</sub> O <sub>4</sub> catalyst.                                                                                                                                      |            |
| <b>Table S2</b> | Comparative electrochemical outcomes of Co <sub>3</sub> O <sub>4</sub> and various Ru-Co <sub>3</sub> O <sub>4</sub> catalyst.                                                           | <b>S30</b> |
| <b>Table S3</b> | Comparison of electrocatalytic performance of as-prepared Ru-Co <sub>3</sub> O <sub>4</sub> 15 with the similar reported electrocatalyst in 1 M KOH medium.                              | <b>S31</b> |
| <b>Table S4</b> | Comparison of electrocatalytic performance of as-prepared Ru-Co <sub>3</sub> O <sub>4</sub> 15 with the similar reported electrocatalyst in 0.5 M H <sub>2</sub> SO <sub>4</sub> medium. | <b>S32</b> |
|                 | References                                                                                                                                                                               | <b>S33</b> |

## Experimental Section

## Reagents used

Cobalt acetate tetrahydrate ( $\text{Co}(\text{OAc})_2 \cdot 4\text{H}_2\text{O}$ ), Ruthenium chloride hydrate ( $\text{RuCl}_3 \cdot x\text{H}_2\text{O}$ ), Polyvinylpyrrolidone ( $(\text{C}_6\text{H}_9\text{NO})_6$ , PVP), Benzene-1,3,5-Benzenetricarboxylic acid ( $\text{C}_9\text{H}_6\text{O}_6$ , BTC), ethanol ( $\text{C}_2\text{H}_5\text{OH}$ ) were purchased from the Sigma-Aldrich and used as received. Deionized water (DI) is used throughout this work.

## Synthesis of Co-BTC derived $\text{Co}_3\text{O}_4$

The Co-BTC particles were synthesized by following the previous reported research article by using MOF as precursor. Typically, 0.15 g of cobalt acetate tetrahydrate and 0.6 g of polyvinylpyrrolidone were dissolved in (1:1) ratio of deionized water and ethanol mixture and marked as solution (I). 180 mg of Benzene-1,3,5-Benzenetricarboxylic acid (BTC) was dissolved in (1:1) ratio of deionized water and ethanol mixture and marked as solution (II). Then the solution (II) was added dropwise and stirred for 15 min and aged for 24 h at room temperature. Then the obtained precipitate was collected, centrifuged, and washed with DI water and ethanol mixture for three times and dried in a hot air oven at 60 °C for 12 h. Then the obtained Co-BTC was annealed at 350 °C for 4 h at a ramping rate of 5°C/min in an air atmosphere. The obtained black powder was represented and named as  $\text{Co}_3\text{O}_4$ .

## Synthesis of Ru doped $\text{Co}_3\text{O}_4$

Briefly, 90 mg of prepared  $\text{Co}_3\text{O}_4$  particles was dispersed in a (1:1) ratio of deionized water and ethanol mixture where 0.010 g/L of  $\text{RuCl}_3 \cdot x\text{H}_2\text{O}$  solution was added and stirred for homogeneity. Then the obtained solution was transferred to a stainless-steel Teflon autoclave and maintained at 120 °C for 12 h. The obtained precipitate was centrifuged and washed several times with water and dried in a hot air oven at 60 °C for 12 h, named as Ru- $\text{Co}_3\text{O}_4$  10. Likewise, we have

prepared another two samples by simply varying the  $\text{RuCl}_3 \cdot x\text{H}_2\text{O}$  solution to 0.015 g/L and 0.020 g/L to form Ru- $\text{Co}_3\text{O}_4$  15 and Ru- $\text{Co}_3\text{O}_4$  20 respectively.

### **Characterization techniques**

The as-prepared samples are initially subjected to XRD analysis with a scanning rate of  $5^\circ \text{ min}^{-1}$  in the  $2\theta$  range  $10\text{-}80^\circ$  using a Bruker X-ray powder diffractometer (XRD) with Cu  $K\alpha$  radiation ( $\lambda = 0.154 \text{ nm}$ ). The morphology of the catalysts was characterized with FE-SEM instrument (SUPRA 55VP Carl Zeiss) with a separate EDS detector connected to that instrument. Energy Dispersive X-ray Spectroscopy (EDS) analysis was done with the assistance of FE-SEM instrument. X-ray photoelectron spectroscopic (XPS) analysis was performed using a Theta Probe AR-XPS system (Thermo Fisher Scientific, UK). HR-TEM, (Tecnai<sup>TM</sup> G2 TF20) working at an accelerating voltage of 200 kV and by Talos F-200-S with HAADF elemental mapping.

### **Electrochemical measurements**

The electrochemical properties were measured using a Metrohm AUTOLAB-M240 instrument with techniques like CV, LSV, and chronoamperometry. All the electrochemical experiments were carried out by employing a conventional three-electrode set-up. (Hg/HgO and saturated calomel electrode (SCE)-reference for alkaline and acidic medium, graphite rod-counter and carbon cloth (CC)-working electrode). The working electrodes were fabricated using 1 mg of polyvinylidene fluoride (PVDF) as a binder and N-Methyl-2-pyrrolidone (NMP) as a slurry preparation agent. Typically, the  $\approx 4:1$  (with respect to overall catalyst loading over the electrode surface) ratio of powder catalyst and PVDF had taken into a mortar, followed by the addition of NMP solvent with continuous mixing by a pestle. Then a certain amount of catalyst ink was fabricated over the  $1 \text{ cm}^2$  area of the carbon cloth (CC). The amount of loaded catalyst was calculated by measuring the difference in weight of coated and uncoated carbon cloth (CC). Then,

EIS analysis of all the catalyst were done at an applied potential of 0.7 V (vs Hg/HgO) and 1.5 V (vs SCE) for pH=14 (1 M KOH), and pH=0.3 (0.5 M H<sub>2</sub>SO<sub>4</sub>) respectively. Likewise, chronoamperometric analysis also carried out at a potential of 0.69 V (vs Hg/HgO) and 1.5 V (vs SCE) for pH=14, pH=0.3 respectively.

For OER in 1 M KOH solution, the commercial Hg/HgO, and graphite were used as a reference and counter electrodes, respectively.

$$E_{\text{RHE}} = E_{\text{ref}} + 0.098 + 0.059\text{pH} \dots \text{equation 1}$$

For OER in 0.5 M H<sub>2</sub>SO<sub>4</sub> solution, the commercial SCE and graphite were used as a reference and counter electrodes, respectively.

$$E_{\text{RHE}} = E_{\text{ref}} + 0.241 + 0.059\text{pH} \dots \text{equation 2}$$

All the potential data were converted into an RHE scale according to the following equation:  
all the polarization results have normalized with respect to geometrical surface area and mass. The ECSA and mass normalization of all the LSV data were done by using the following relations:

$$\text{ECSA normalization} = \text{Current density} / \text{ECSA} \dots \text{equation 3}$$

$$\text{Mass normalization} = \text{Current density} / \text{Loading} \dots \text{equation 4}$$

## Overpotential

The overpotential values of all the catalysts were calculated at a benchmarking current density of 50 mA cm<sup>-2</sup> by employing the following relation:

$$\eta_{10}(\text{OER}) = (E_{\text{obs}} - 1.23) \text{ V versus RHE} \dots \text{equation 5}$$

$$\eta_{10}(\text{HER}) = (0 - E_{\text{obs}}) \text{ V versus RHE} \dots \text{equation 6}$$

## The Tafel Slope

The Tafel slope was calculated by fitting the overpotential versus log (j) using the Tafel equation as given below:

$$\eta = b \times \log (j/j_0) \dots\dots\dots \text{equation 7}$$

where “*b*” signifies the Tafel slope value, “*j*” implies the current density value, and “*j*<sub>0</sub>” is the exchange current density. Electrochemical impedance spectroscopy (EIS) measurements were done on the frequency ranges from 10<sup>5</sup> to 0.1 Hz.

## Electrochemical Active Surface Area (ECSA)

The electrochemical active surface areas (ECSA) were measured by determining the electrochemical C<sub>dl</sub> using the following equations:

$$i_c = v \times C_{dl} \dots\dots\dots \text{equation 8}$$

$$\text{ECSA} = C_{dl}/C_s \dots\dots\dots \text{equation 9}$$

where “*i*<sub>c</sub>” indicates the double-layer charging current resulting from scan-rates (v) dependent CVs at non-faradic potential, and “*C*<sub>s</sub>” denotes a specific capacitance value of 0.040 mF cm<sup>-2</sup> depending on the typical reported values.

## Turnover Frequency (TOF)

The amount of oxygen/hydrogen that is evolved per unit of time is known as the TOF. The TOF of the catalyst can be determined by the below expression,

$$\text{TOF} = \frac{j \times N_A}{n \times F \times \tau} \dots\dots\dots \text{equation 10}$$

where, *j* = current density, *N*<sub>A</sub> = Avogadro number, *F* = Faraday constant (96 485 C mol<sup>-1</sup>), *n* = Number of electrons (For OER, *n* = 4 and HER, *n* = 2), *Γ* = Surface concentration.

## Faradaic Efficiency (FE):

For the RRDE experiment, 4 mg of Au@LaFeO<sub>3</sub> catalyst was added to a solution containing 750 μL of H<sub>2</sub>O, 200 μL of ethanol, and 50 μL of 5% Nafion solution. The above mixture was probe sonicated for 20 min to prepare a homogeneous catalyst ink. Later, 15 μL of homogeneous ink was drop-casted over the GC disk of RRDE set up with an effective surface area of ≈0.197 cm<sup>2</sup>. The Pt ring was used with a constant potential of 0.3V versus RHE to reduce the as-formed O<sub>2</sub> in situ. The FE was calculated from the ratio of the ring current to the disk using the following expression:

$$FE = I_{\text{ring}} / (I_{\text{disk}} \times N) \times 100 \dots\dots\dots \text{equation 11}$$

where, “I<sub>ring</sub>” and “I<sub>disk</sub>” are the ring and disk current density in mA cm<sup>-2</sup>, respectively; “N” is the collection efficiency having a constant value of 0.249.

**Determination of surface concentration, Charge over the electrode surface and TOF values of all four catalyst from the redox features of CV:<sup>1,2</sup>**

- Calculated area associated with the oxidation of Co<sup>2+</sup> to Co<sup>3+</sup> of **Co<sub>3</sub>O<sub>4</sub>** = 0.00003203 VA

Hence, the associated charge is = 0.00003203 VA / 0.1 Vs<sup>-1</sup>

$$= 0.0003203 \text{ As}$$

$$= \mathbf{0.0003203 \text{ C}}$$

- Calculated area associated with the oxidation of Co<sup>2+</sup> to Co<sup>3+</sup> of **Ru-Co<sub>3</sub>O<sub>4</sub> 10** = 0.0004051 VA

Hence, the associated charge is = 0.0004051 VA / 0.1 Vs<sup>-1</sup>

$$= 0.004051 \text{ As}$$

$$= \mathbf{0.004051 \text{ C}}$$

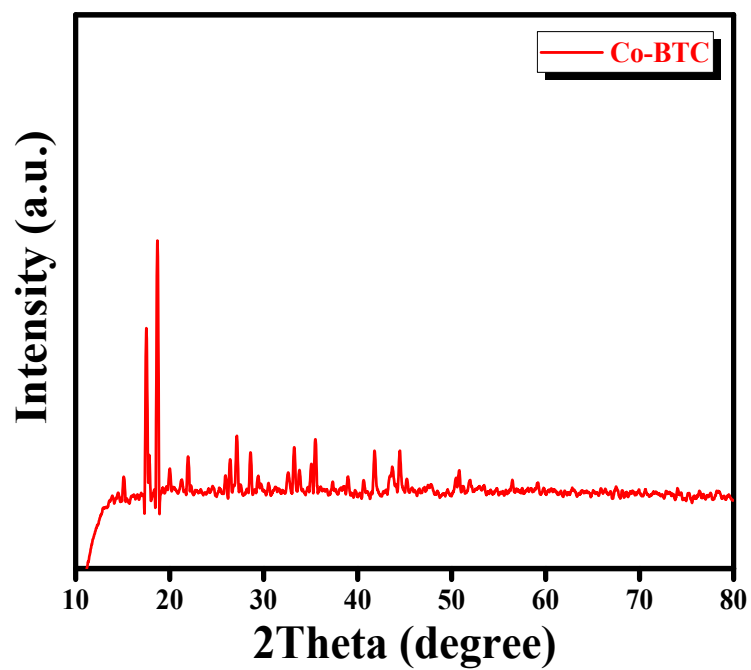

**Figure S1:** PXRD pattern of Co-BTC (BTC-benzene tricarboxylic acid).

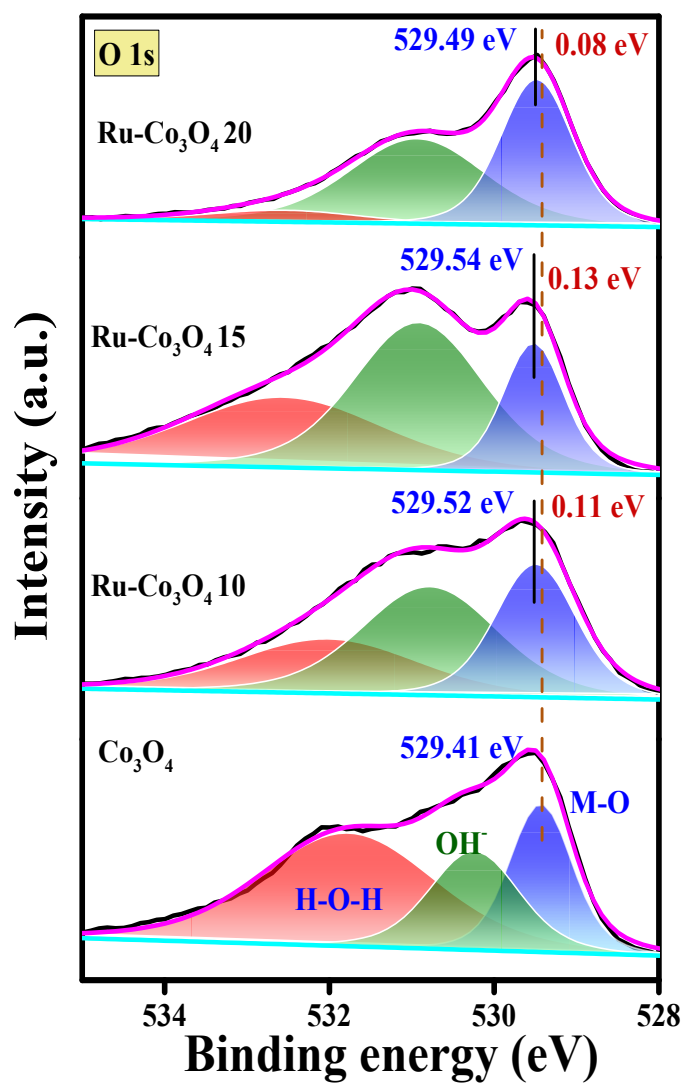

**Figure S2:** Deconvoluted O 1s XPS spectra of Co<sub>3</sub>O<sub>4</sub>, Ru-Co<sub>3</sub>O<sub>4</sub> 10, Ru-Co<sub>3</sub>O<sub>4</sub> 15 and Ru-Co<sub>3</sub>O<sub>4</sub> 20.

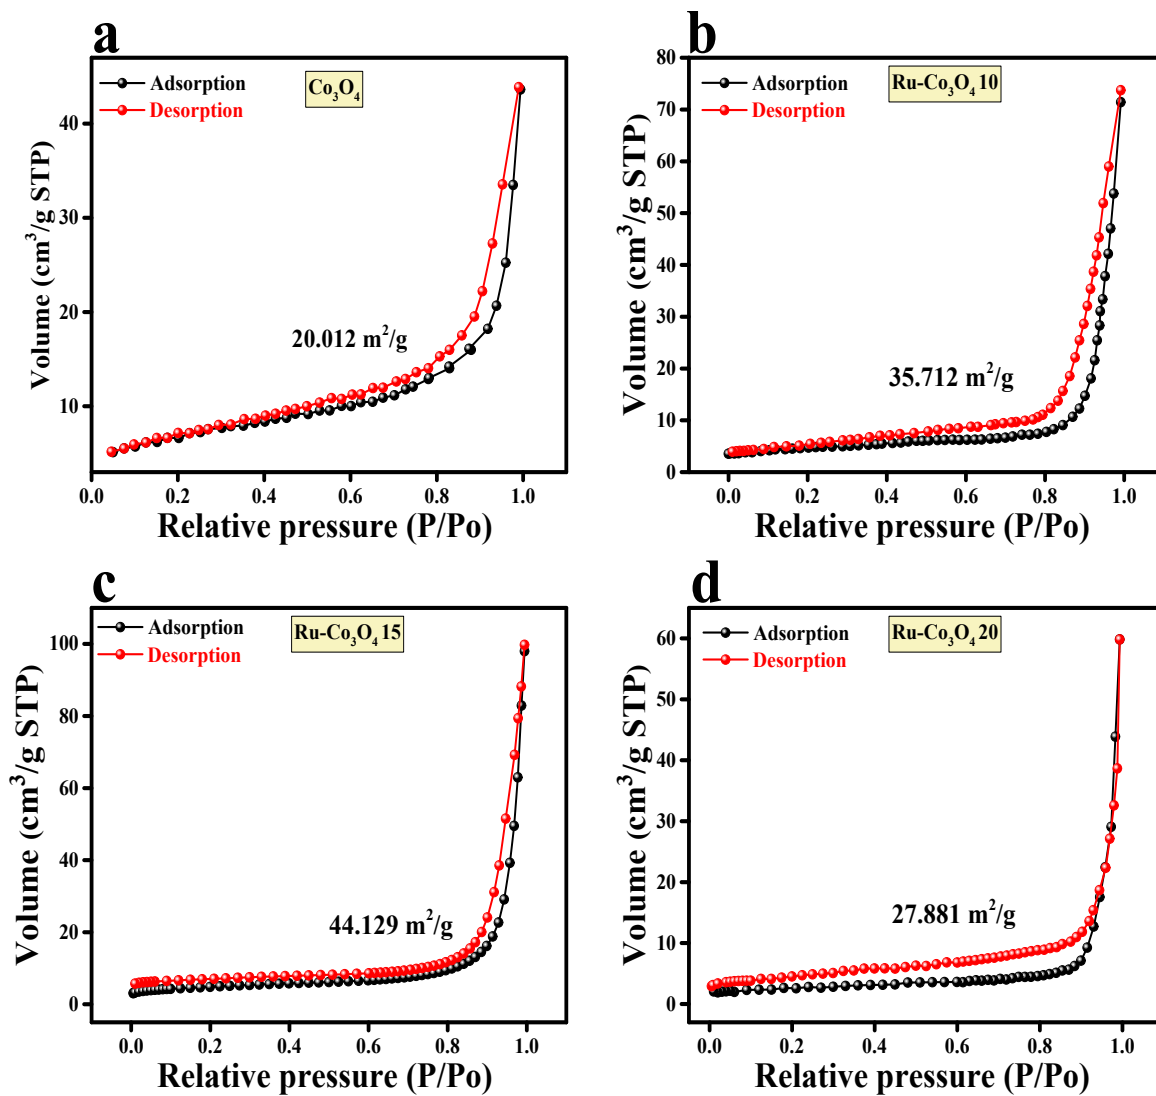

**Figure S3:** (a-d) N<sub>2</sub> adsorption-desorption of Co<sub>3</sub>O<sub>4</sub>, Ru-Co<sub>3</sub>O<sub>4</sub> 10, Ru-Co<sub>3</sub>O<sub>4</sub> 15 and Ru-Co<sub>3</sub>O<sub>4</sub> 20 respectively.

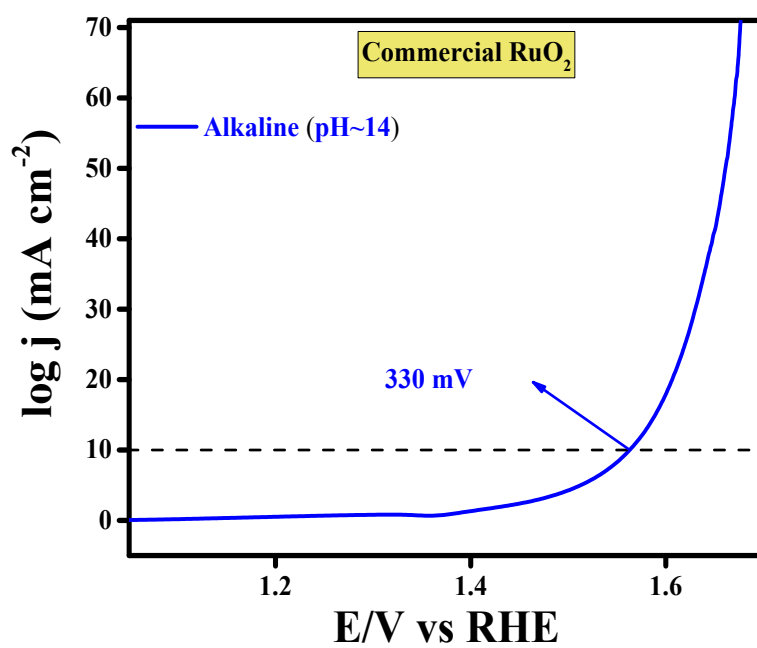

**Figure S4:** LSV polarization result of commercial  $\text{RuO}_2$  in 1 M KOH electrolyte.

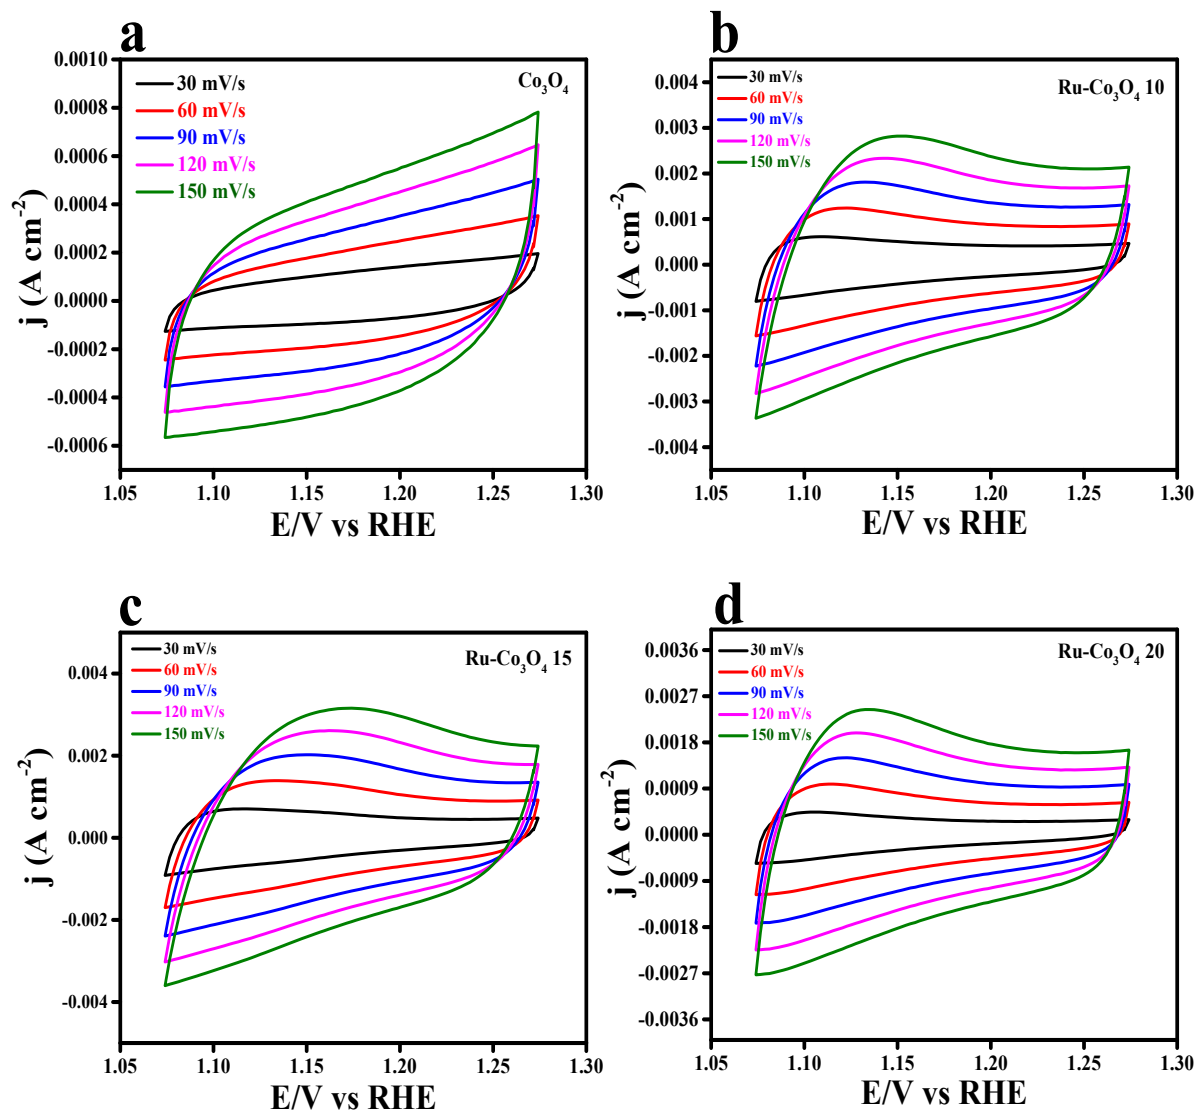

**Figure S5:** CVs recorded at non-faradaic region at a different scan rate for  $\text{Co}_3\text{O}_4$ ,  $\text{Ru-Co}_3\text{O}_4$  10,  $\text{Ru-Co}_3\text{O}_4$  15 and  $\text{Ru-Co}_3\text{O}_4$  20 respectively in 1 M KOH electrolyte.

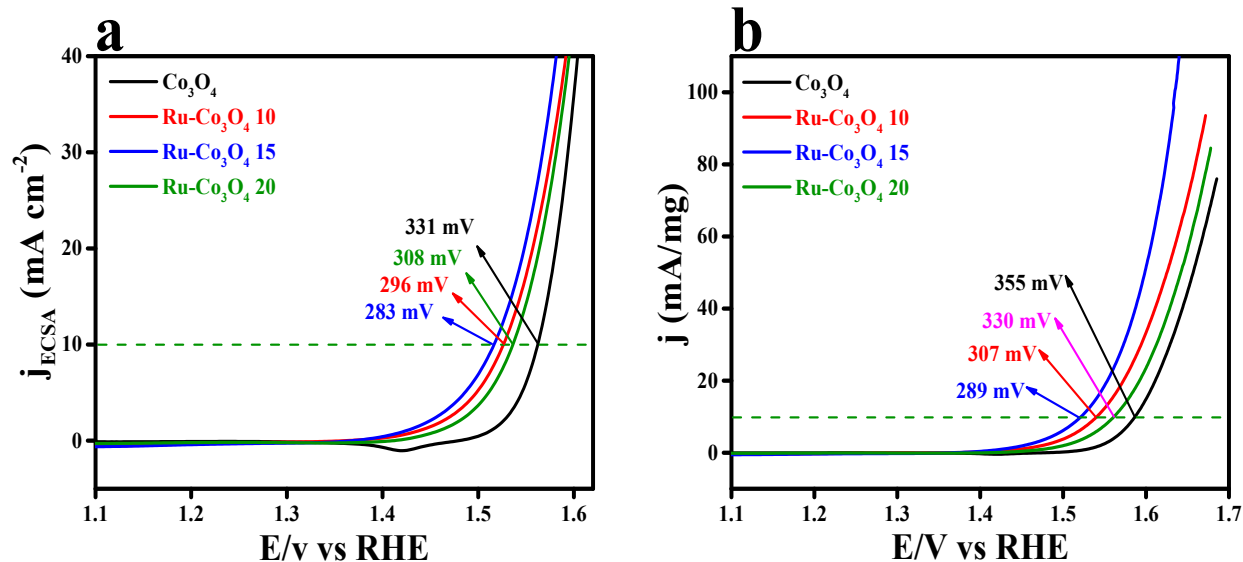

**Figure S6:** (a and b) ECSA normalized (specific activity) and mass dependent activity of  $\text{Co}_3\text{O}_4$ ,  $\text{Ru-Co}_3\text{O}_4$  10,  $\text{Ru-Co}_3\text{O}_4$  15 and  $\text{Ru-Co}_3\text{O}_4$  20 respectively in 1

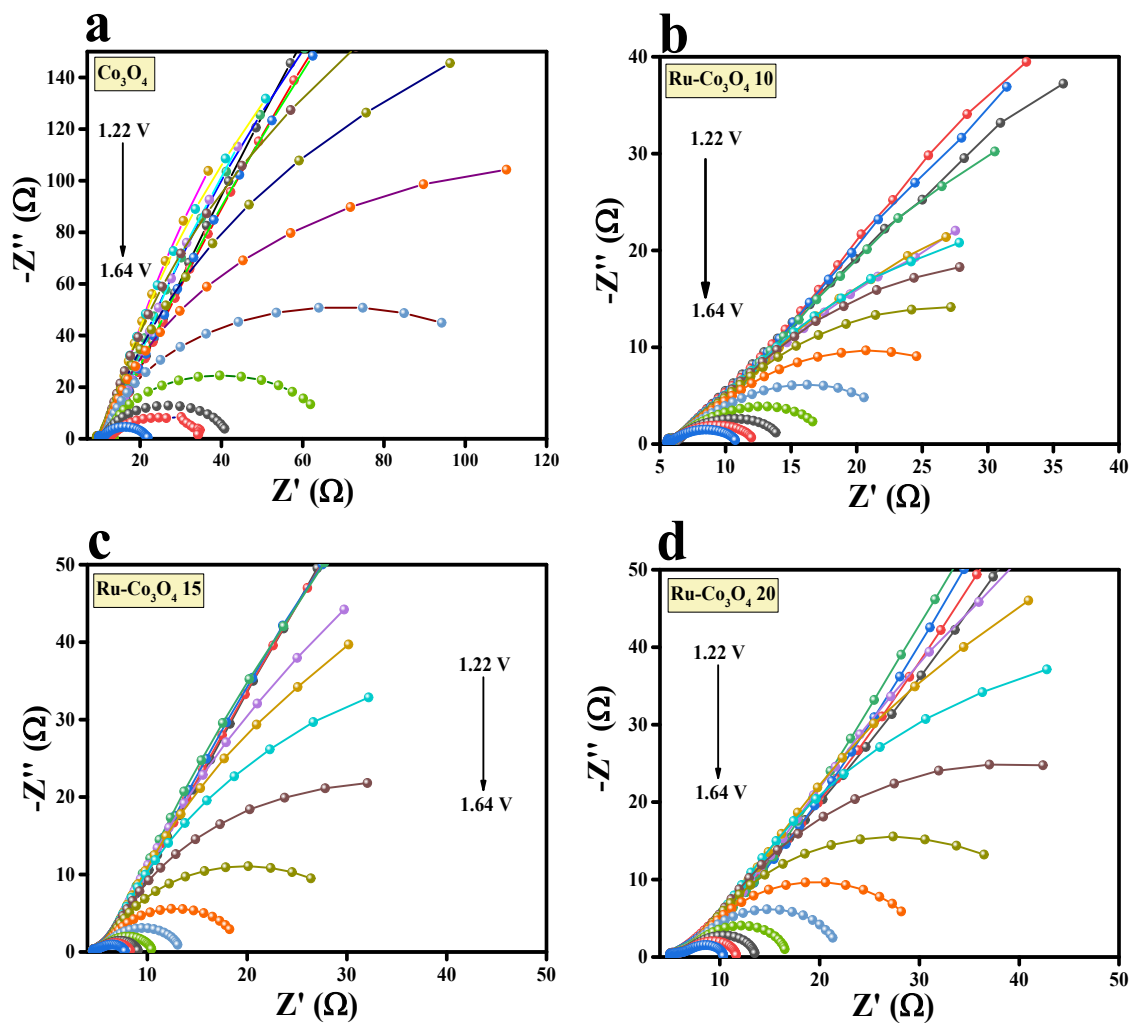

**Figure S7:** (a-d) Operando Nyquist plot of  $\text{Co}_3\text{O}_4$ ,  $\text{Ru-Co}_3\text{O}_4$  10,  $\text{Ru-Co}_3\text{O}_4$  15 and  $\text{Ru-Co}_3\text{O}_4$  20 respectively.

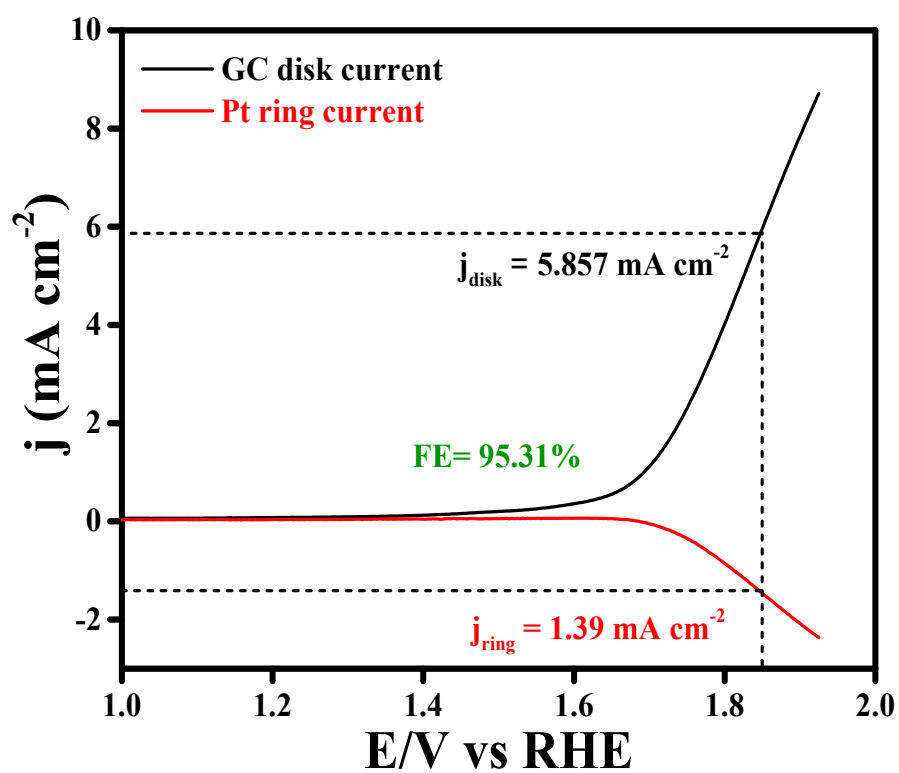

**Figure S8:** Faradaic efficiency (FE) of the Ru-Co<sub>3</sub>O<sub>4</sub> 15 electrocatalyst for OER in 1 M KOH solution.

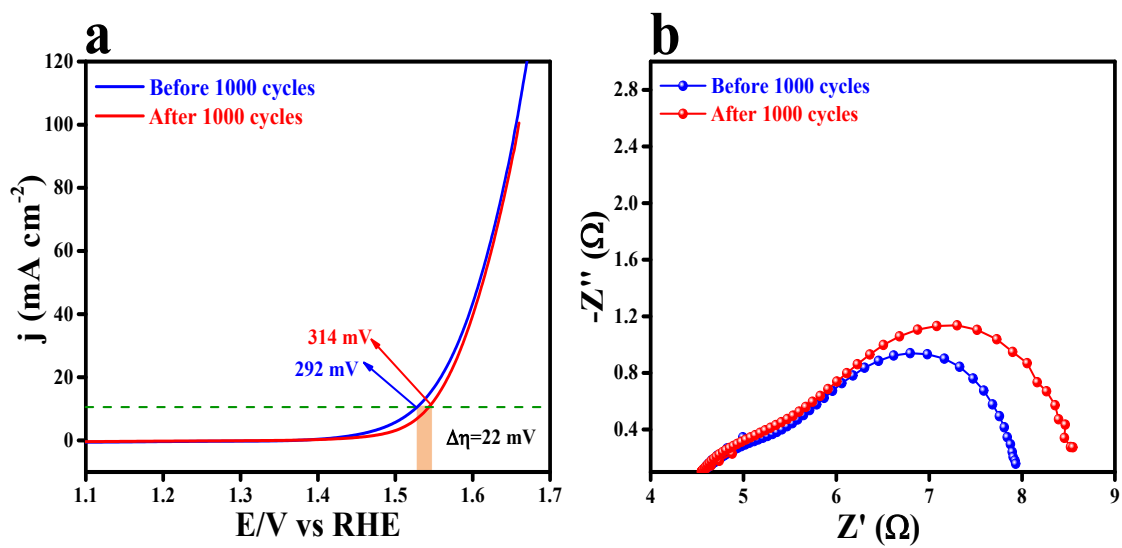

**Figure S9:** (a) LSV polarization curves of Ru-Co<sub>3</sub>O<sub>4</sub> 15 after 1000 continuous CV cycles in 1 M KOH solution; (b) corresponding EIS analysis.

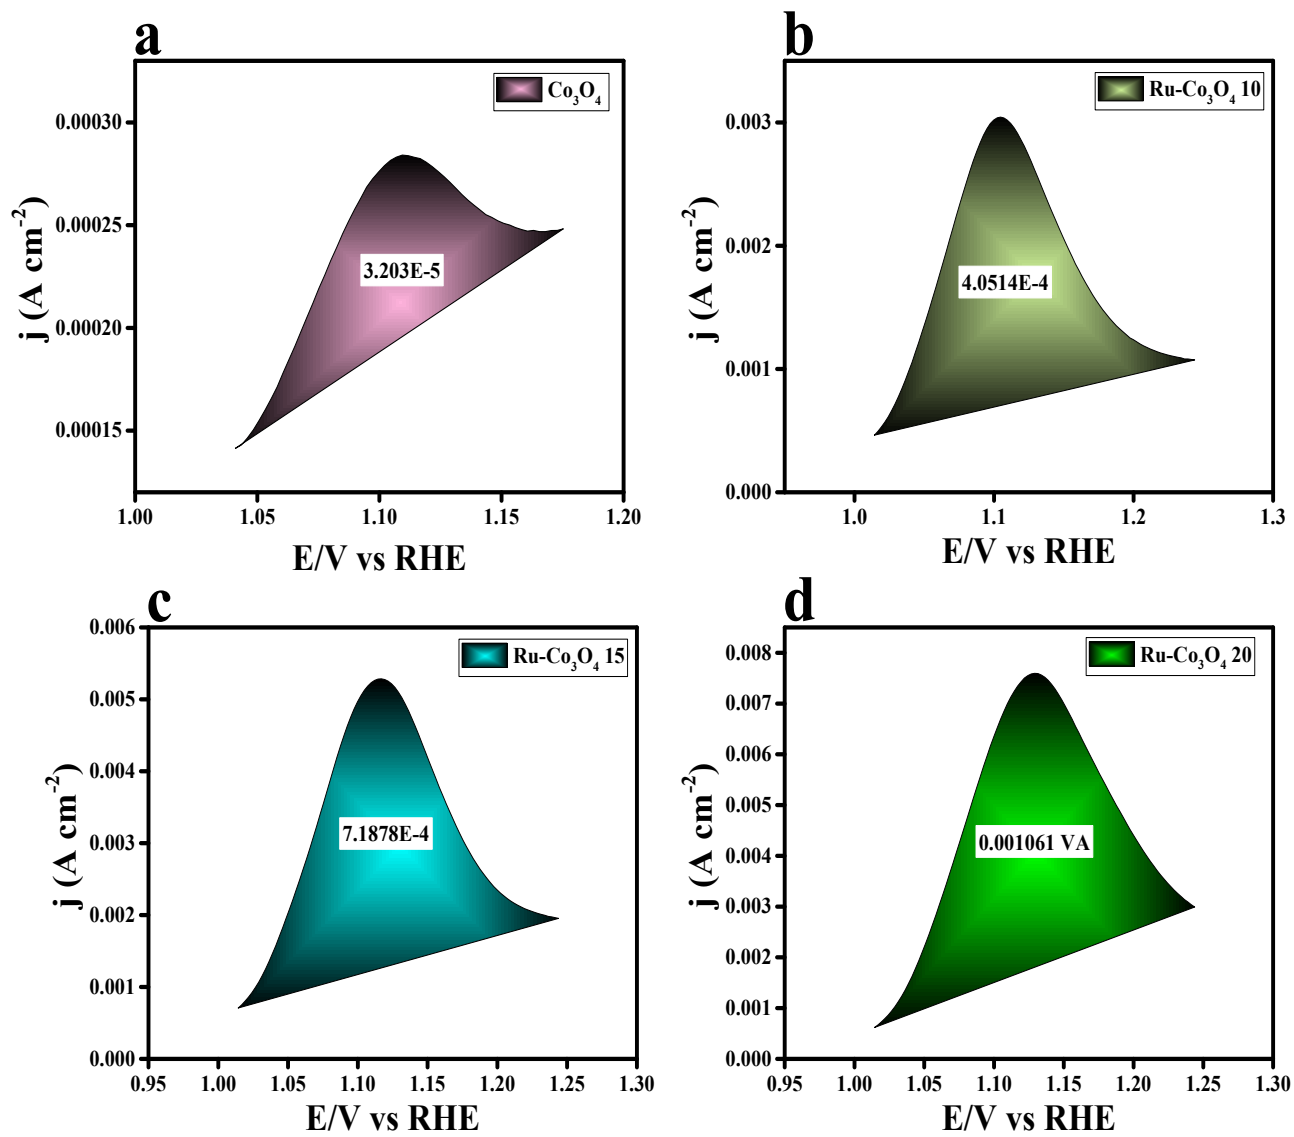

**Figure S10:** (a-d) Redox feature (oxidation area) of Co<sub>3</sub>O<sub>4</sub>, Ru-Co<sub>3</sub>O<sub>4</sub> 10, Ru-Co<sub>3</sub>O<sub>4</sub> 15 and Ru-Co<sub>3</sub>O<sub>4</sub> 20 respectively measured at 100 mV/s.

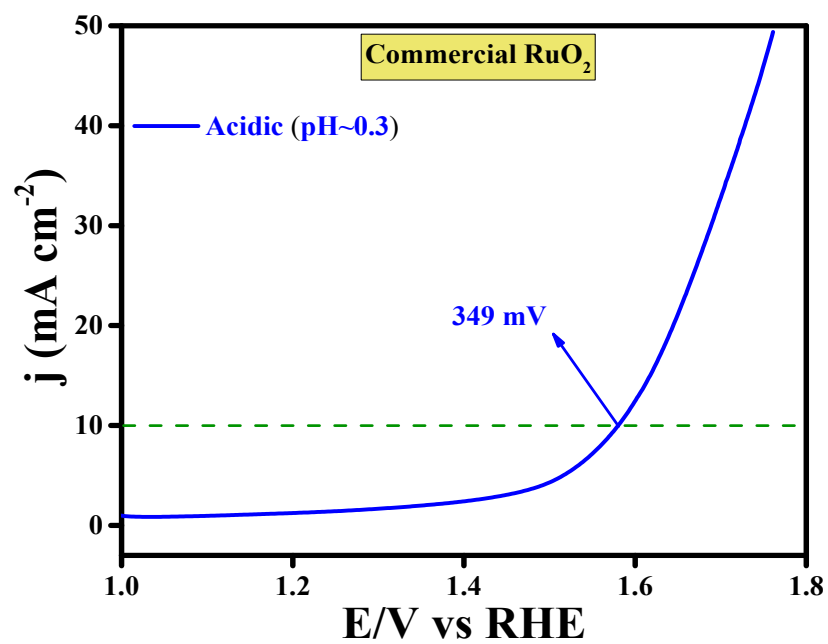

**Figure S11:** LSV polarization result of commercial RuO<sub>2</sub> in 0.5 M H<sub>2</sub>SO<sub>4</sub> electrolyte.

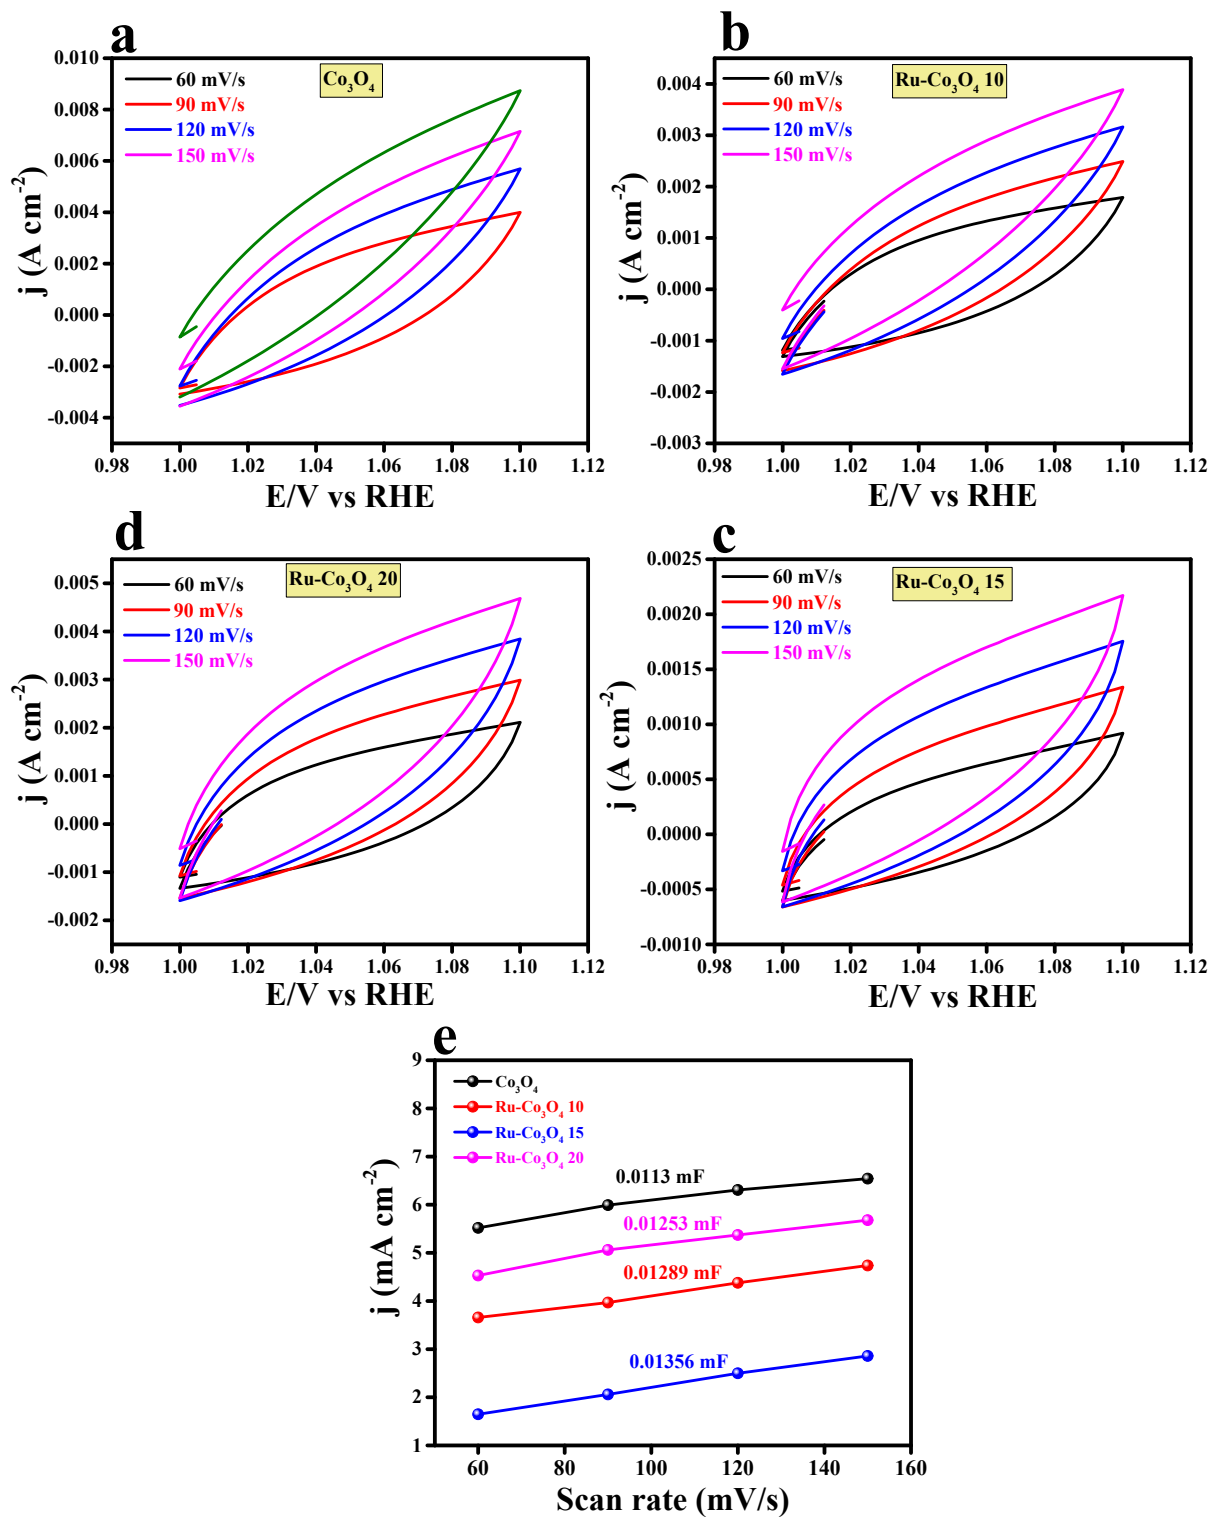

**Figure S12:** (a-d) CVs recorded at non-faradaic region at a different scan rate for  $\text{Co}_3\text{O}_4$ ,  $\text{Ru-Co}_3\text{O}_4$  10,  $\text{Ru-Co}_3\text{O}_4$  15 and  $\text{Ru-Co}_3\text{O}_4$  20 respectively in 0.5 M  $\text{H}_2\text{SO}_4$  electrolyte; (e)  $C_{dl}/1000$  values measured from the obtained CV curves.

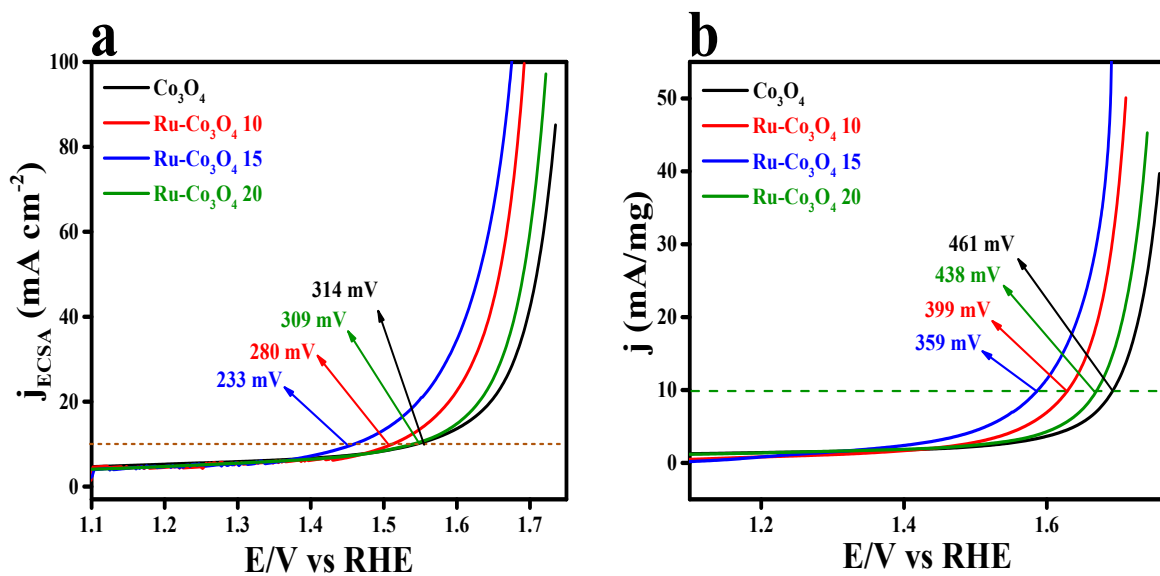

**Figure S13:** (a and b) ECSA normalized (specific activity) and mass dependent activity of Co<sub>3</sub>O<sub>4</sub>, Ru-Co<sub>3</sub>O<sub>4</sub> 10, Ru-Co<sub>3</sub>O<sub>4</sub> 15 and Ru-Co<sub>3</sub>O<sub>4</sub> 20 respectively in 0.5 M H<sub>2</sub>SO<sub>4</sub>.

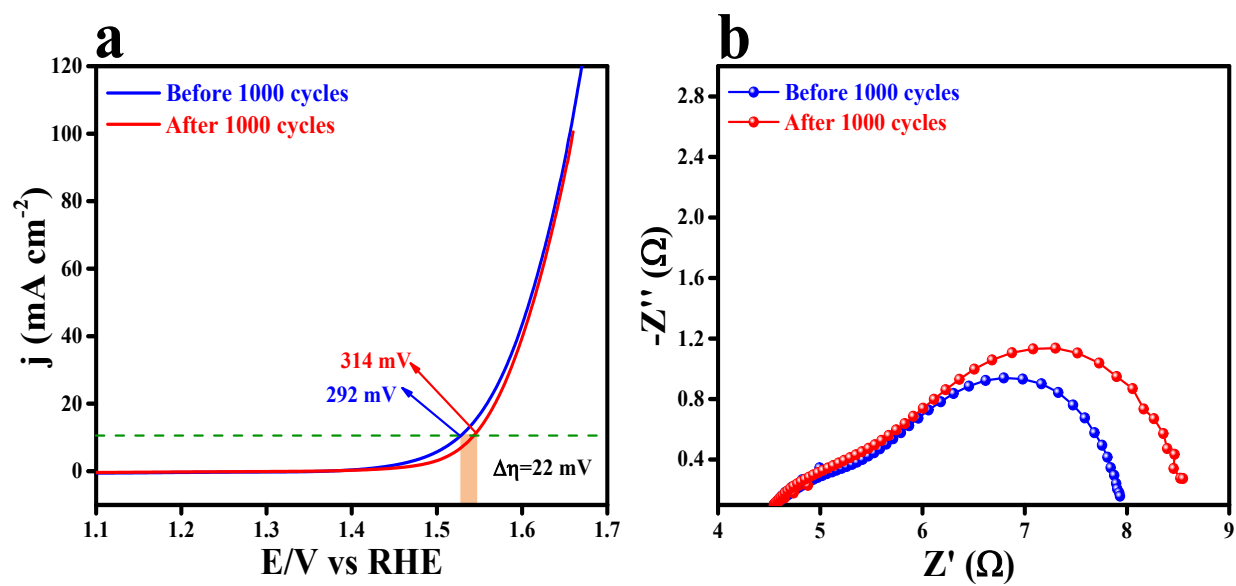

**Figure S14:** (a) LSV polarization curves of Ru-Co<sub>3</sub>O<sub>4</sub> 15 after 1000 continuous CV cycles in 0.5 M H<sub>2</sub>SO<sub>4</sub> solution; (b) corresponding EIS analysis.

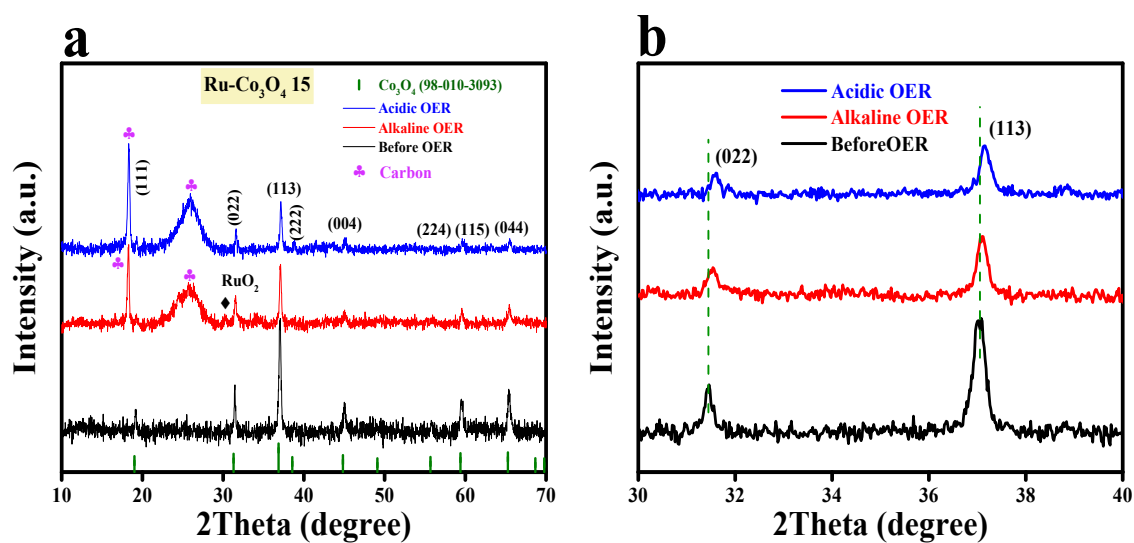

**Figure S15:** (a) XRD pattern of Ru-Co<sub>3</sub>O<sub>4</sub> 15 before and after OER analysis in alkaline and acidic medium; (b) corresponding enlarged XRD plane of 022 and (113).

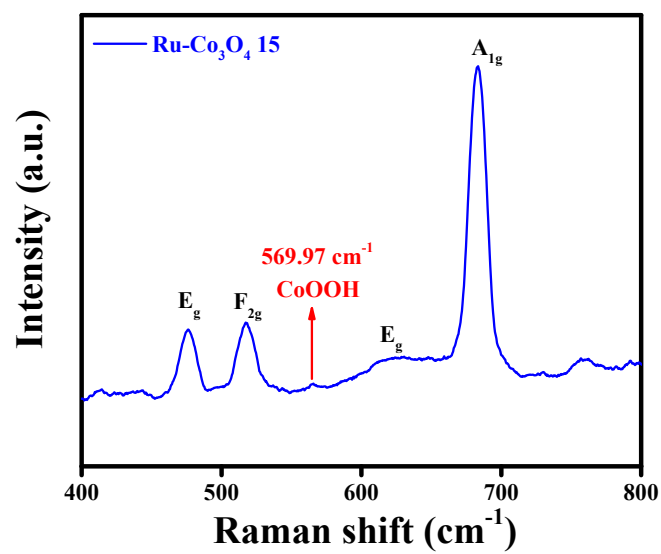

**Figure S16:** Post Raman spectra of Ru-Co<sub>3</sub>O<sub>4</sub> in 0.5 M H<sub>2</sub>SO<sub>4</sub> solution.

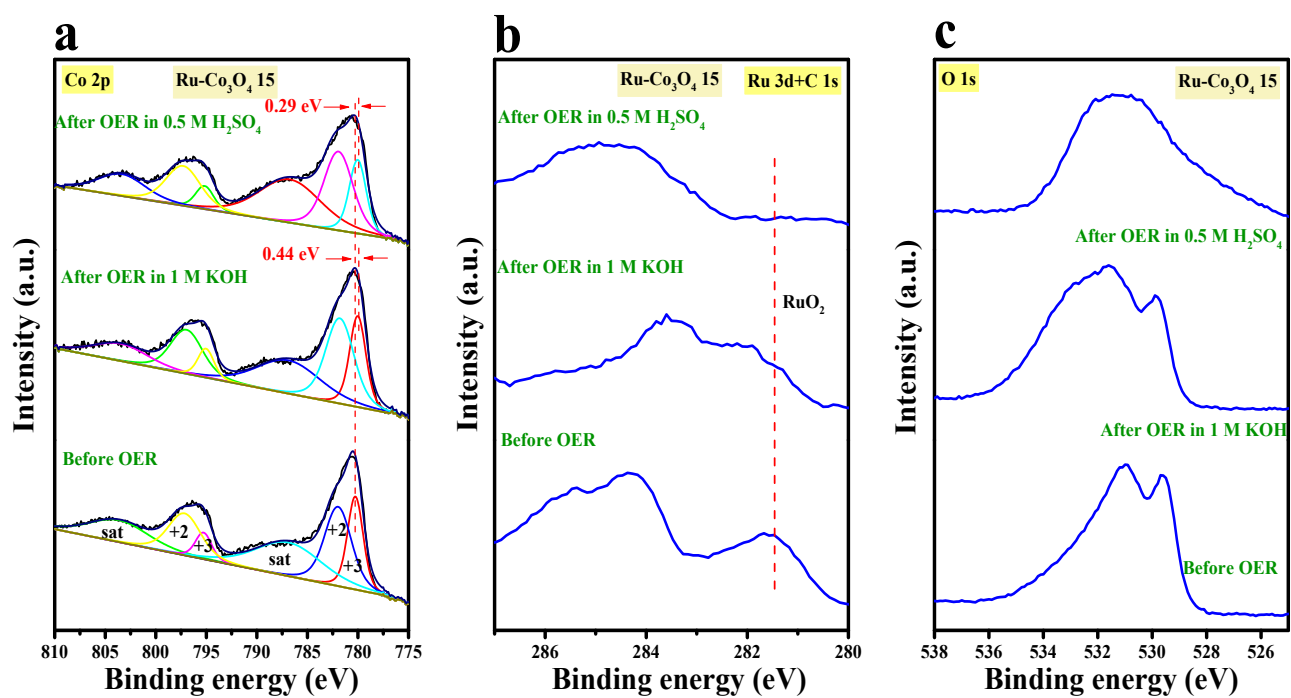

**Figure S17:** (a-c) Deconvoluted Co 2p XPS spectra, high resolution XPS spectra of Ru 3d+C 1s and O 1s of Ru-Co<sub>3</sub>O<sub>4</sub> 15 after OER analysis in 1 M KOH and 0.5 M H<sub>2</sub>SO<sub>4</sub> solution.

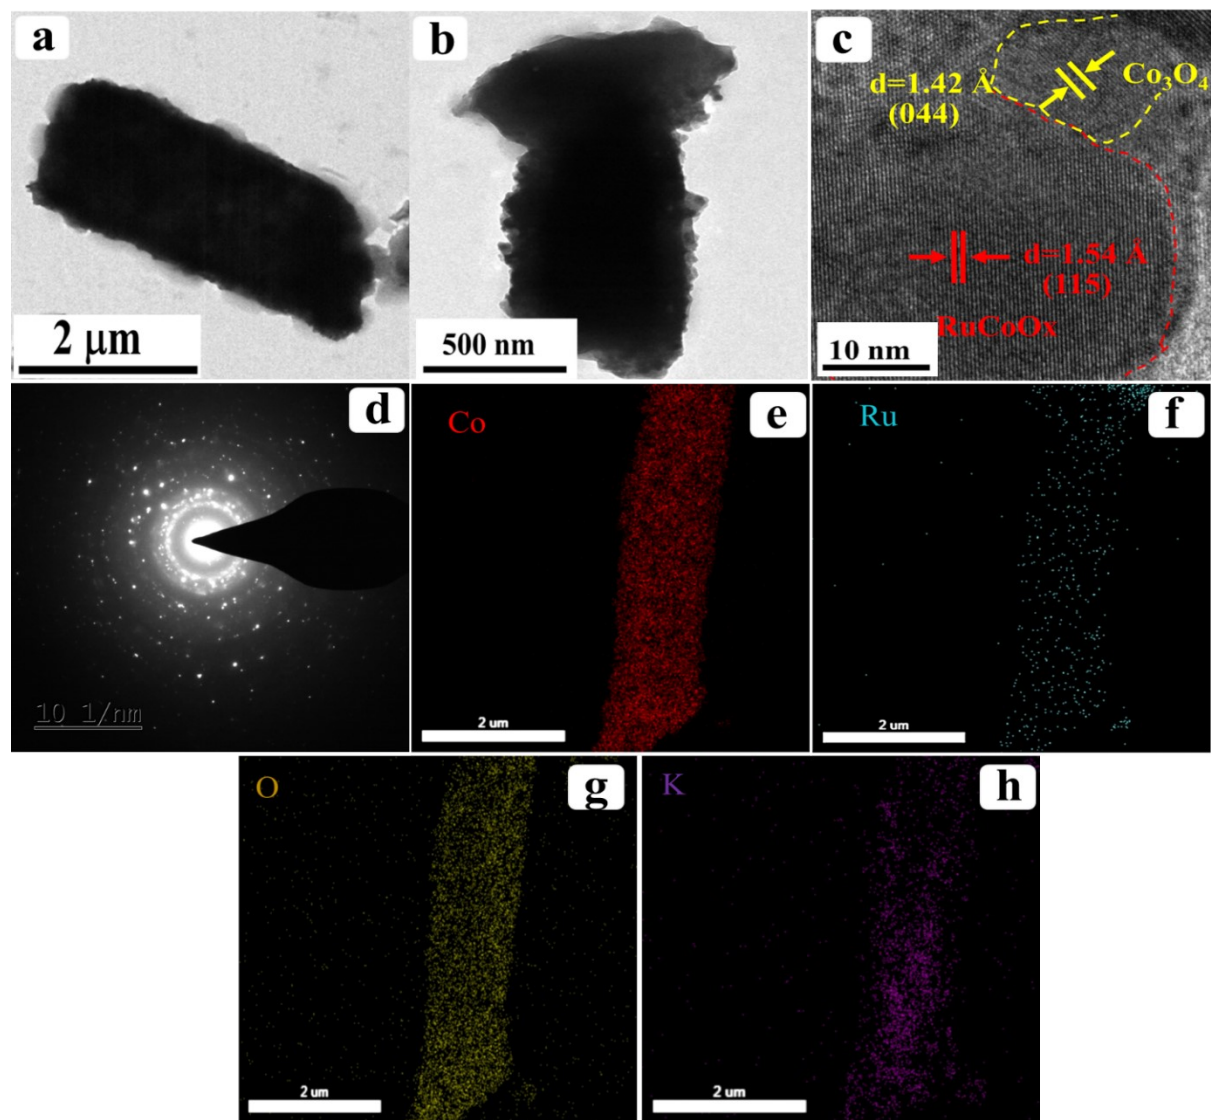

**Figure S18:** (a and b) Shows the low to high magnified HR-TEM images; (c and d) corresponding lattice fringes and SAED pattern; (e-h) elemental mapping results of Co, Ru, O and K of Ru-Co<sub>3</sub>O<sub>4</sub> 15 after OER analysis in 1 M KOH respectively.

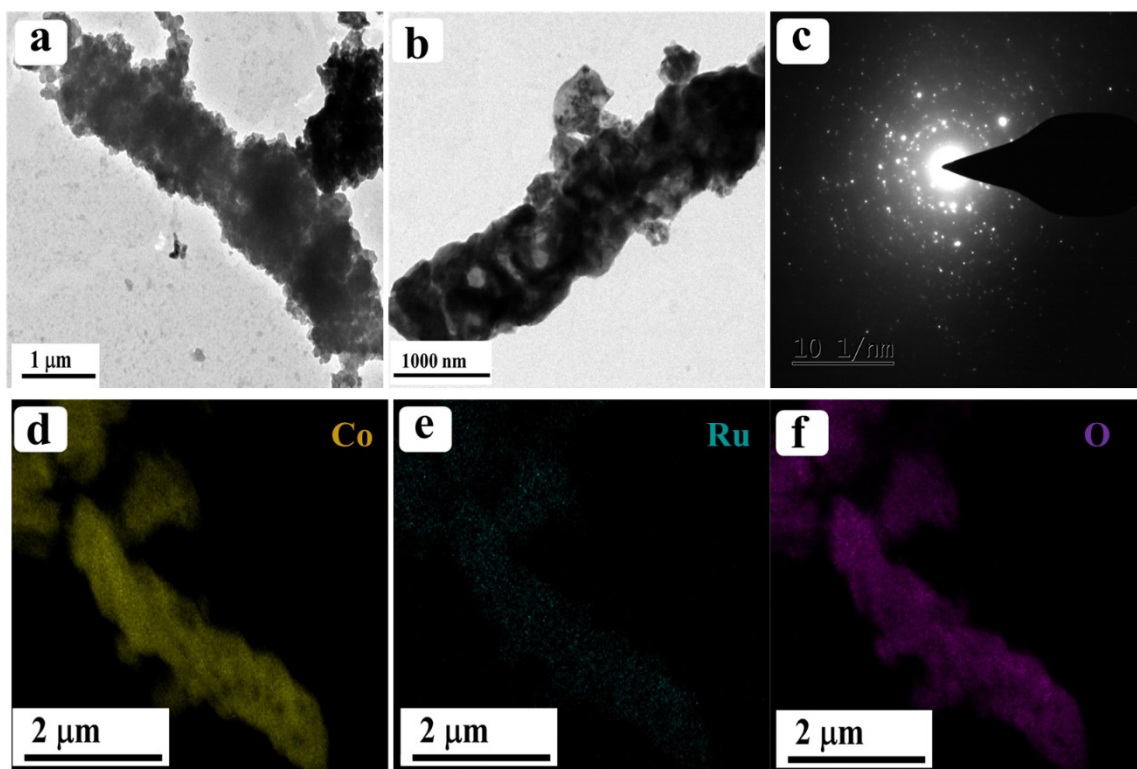

**Figure S19:** (a and b) Shows the low to high magnified HR-TEM images; (c) corresponding SAED pattern; (d-f) elemental mapping results of Co, Ru, O of Ru-Co<sub>3</sub>O<sub>4</sub> 15 after OER analysis in 0.5 M H<sub>2</sub>SO<sub>4</sub> respectively.

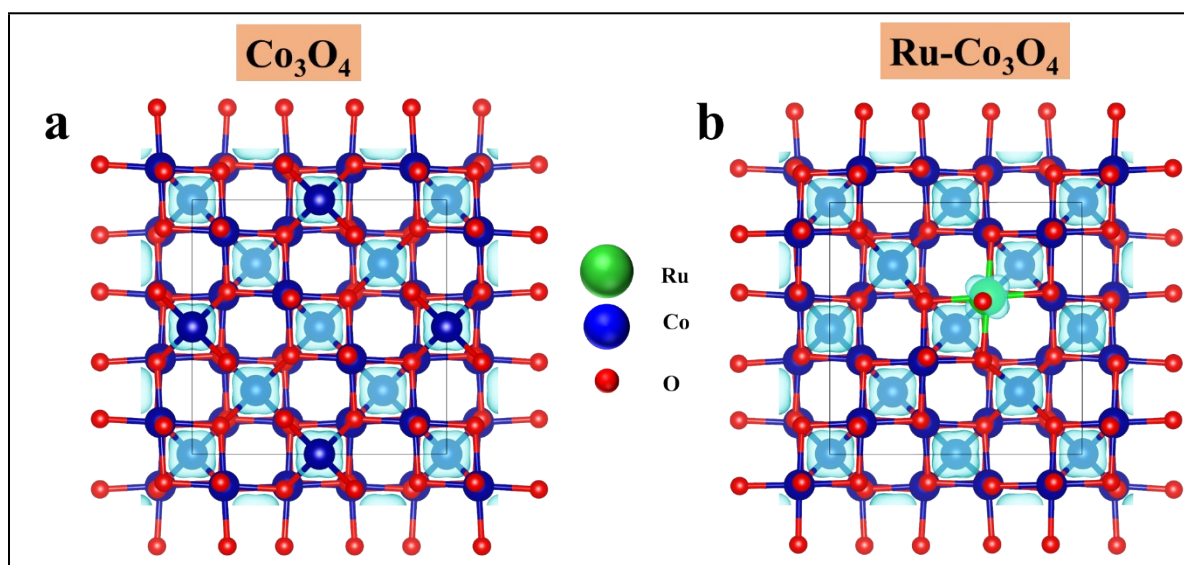

**Figure S20:** (a and b) Depicts the optimized electronic structure of  $\text{Co}_3\text{O}_4$  and Ru doped  $\text{Co}_3\text{O}_4$  respectively.

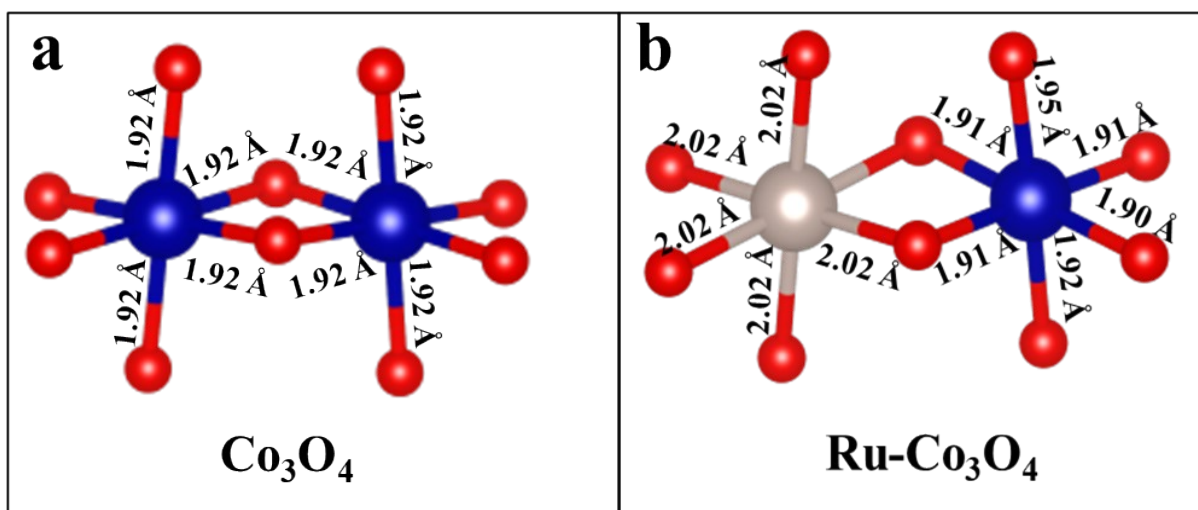

**Figure S21:** (a and b) Shows the determination of bond length before and after doping of Ru towards  $\text{Co}_3\text{O}_4$  respectively.

| <b>Sl. No.</b> | <b>Compound</b>                      | <b>TOF@350 mV overpotential (<math>\times 10^{-5} \text{ s}^{-1}</math>)</b> | <b>TOF@370 mV overpotential (<math>\times 10^{-5} \text{ s}^{-1}</math>)</b> |
|----------------|--------------------------------------|------------------------------------------------------------------------------|------------------------------------------------------------------------------|
| <b>1</b>       | Co <sub>3</sub> O <sub>4</sub>       | 1.130201                                                                     | 2.167435                                                                     |
| <b>2</b>       | Ru-Co <sub>3</sub> O <sub>4</sub> 10 | 3.236643                                                                     | 4.661346                                                                     |
| <b>3</b>       | Ru-Co <sub>3</sub> O <sub>4</sub> 15 | 4.474788                                                                     | 6.644037                                                                     |
| <b>4</b>       | Ru-Co <sub>3</sub> O <sub>4</sub> 20 | 2.059517                                                                     | 3.174068                                                                     |

**Table S1:** TOF values calculated at 350 and 370 mV overpotential for Co<sub>3</sub>O<sub>4</sub> and various Ru-Co<sub>3</sub>O<sub>4</sub> catalyst.

| <b>Sl. No.</b> | <b>Compound</b>                      | <b>Reduction surface area (VA)</b> | <b>Charge over the electrode surface (C)</b> |
|----------------|--------------------------------------|------------------------------------|----------------------------------------------|
| <b>1</b>       | Co <sub>3</sub> O <sub>4</sub>       | 0.00003203                         | 0.0003203                                    |
| <b>2</b>       | Ru-Co <sub>3</sub> O <sub>4</sub> 10 | 0.0004051                          | 0.004051                                     |
| <b>3</b>       | Ru-Co <sub>3</sub> O <sub>4</sub> 15 | 0.0007187                          | 0.007187                                     |
| <b>4</b>       | Ru-Co <sub>3</sub> O <sub>4</sub> 20 | 0.001061                           | 0.01061                                      |

**Table S2:** Comparative electrochemical outcomes of Co<sub>3</sub>O<sub>4</sub> and various Ru-Co<sub>3</sub>O<sub>4</sub> catalyst.

| Sl.No     | Electrocatalyst                                         | Substrate | Overpot<br>ential<br>(mV) | Electrolyte<br>(M) | Current<br>density (mA<br>cm <sup>-2</sup> ) | Reference        |
|-----------|---------------------------------------------------------|-----------|---------------------------|--------------------|----------------------------------------------|------------------|
| 1         | Fe-doped Co <sub>3</sub> O <sub>4</sub>                 | GCE       | 318                       | 1 M KOH            | 10 mA cm <sup>-2</sup>                       | 3                |
| 2         | Mn <sub>x</sub> Co <sub>3-x</sub> O <sub>4</sub>        | NF        | 218                       | 3 M NaOH           | 10 mA cm <sup>-2</sup>                       | 4                |
| 3         | Ru/Ni-Co <sub>3</sub> O <sub>4</sub>                    | GCE       | 290                       | 1 M KOH            | 10 mA cm <sup>-2</sup>                       | 5                |
| 4         | (Ru-Co)O <sub>x</sub> -350                              | GCE       | 265                       | 1 M KOH            | 10 mA cm <sup>-2</sup>                       | 6                |
| 5         | Ru@CoFe-LDH(3%)                                         | CC        | 249                       | 1 M KOH            | 10 mA cm <sup>-2</sup>                       | 7                |
| 6         | NiCo <sub>1.7</sub> Ru <sub>0.3</sub> O <sub>4</sub>    | GCE       | 280                       | 1 M KOH            | 10 mA cm <sup>-2</sup>                       | 8                |
| 7         | RuO <sub>2</sub> /Co <sub>3</sub> O <sub>4</sub>        | GCE       | 302                       | 1 M KOH            | 10 mA cm <sup>-2</sup>                       | 9                |
| 8         | F <sub>0.2</sub> -V-Co <sub>3</sub> O <sub>4</sub> -350 | GCE       | 320                       | 1 M KOH            | 10 mA cm <sup>-2</sup>                       | 10               |
| 9         | Co-RuO <sub>2</sub>                                     | CC        | 238                       | 1 M KOH            | 10 mA cm <sup>-2</sup>                       | 11               |
| <b>10</b> | <b>Ru-Co<sub>3</sub>O<sub>4</sub> 15</b>                | <b>CC</b> | <b>292</b>                | <b>1 M KOH</b>     | <b>10 mA cm<sup>-2</sup></b>                 | <b>This work</b> |

NF- Nickel Foam, GCE-Glassy carbon electrode, FTO-Fluorine Doped Tin Oxide Coated Glass,  
CC- Carbon Cloth.

**Table S3:** Comparison of electrocatalytic performance of as-prepared Ru-Co<sub>3</sub>O<sub>4</sub> 15 with the similar reported electrocatalyst in alkaline medium.

| Sl.No     | Electrocatalyst                                                      | Substrate | Overpot<br>ential<br>(mV) | Electrolyte<br>(M)                       | Current<br>density (mA<br>cm <sup>-2</sup> ) | Reference        |
|-----------|----------------------------------------------------------------------|-----------|---------------------------|------------------------------------------|----------------------------------------------|------------------|
| 1         | Co-RuO <sub>2</sub>                                                  | CC        | 328                       | 0.5 M H <sub>2</sub> SO <sub>4</sub>     | 10 mA cm <sup>-2</sup>                       | 11               |
| 2         | Co <sub>3-x</sub> Ba <sub>x</sub> O <sub>4</sub>                     | Pt wire   | 278                       | 0.5 M H <sub>2</sub> SO <sub>4</sub>     | 10 mA cm <sup>-2</sup>                       | 12               |
| 3         | Ag-Co <sub>3</sub> O <sub>4</sub>                                    | FTO       | 370                       | 0.5 M H <sub>2</sub> SO <sub>4</sub>     | 10 mA cm <sup>-2</sup>                       | 13               |
| 4         | Co <sub>3</sub> O <sub>4</sub> /CeO <sub>2</sub>                     | FTO       | 423                       | 0.5 M H <sub>2</sub> SO <sub>4</sub>     | 10 mA cm <sup>-2</sup>                       | 14               |
| 5         | UfD-RuO <sub>2</sub>                                                 | CC        | 179                       | 0.5 M H <sub>2</sub> SO <sub>4</sub>     | 10 mA cm <sup>-2</sup>                       | 15               |
| 6         | Y <sub>2</sub> [Ru <sub>1.6</sub> Y <sub>0.4</sub> ]O <sub>7-δ</sub> | GCE       | 190                       | 0.1 M HClO <sub>4</sub>                  | 10 mA cm <sup>-2</sup>                       | 16               |
| 7         | Ag-Co <sub>3</sub> O <sub>4</sub> 400                                | GCE       | 470                       | 0.5 M H <sub>2</sub> SO <sub>4</sub>     | 10 mA cm <sup>-2</sup>                       | 17               |
| 8         | Li <sub>0.52</sub> RuO <sub>2</sub>                                  | GCE       | 156                       | 0.5 M H <sub>2</sub> SO <sub>4</sub>     | 10 mA cm <sup>-2</sup>                       | 18               |
| 9         | Co doped RuO <sub>2</sub>                                            | GCE       | 169                       | 0.5 M H <sub>2</sub> SO <sub>4</sub>     | 10 mA cm <sup>-2</sup>                       | 19               |
| <b>10</b> | <b>Ru-Co<sub>3</sub>O<sub>4</sub> 15</b>                             | <b>CC</b> | <b>365</b>                | <b>0.5 M H<sub>2</sub>SO<sub>4</sub></b> | <b>10 mA cm<sup>-2</sup></b>                 | <b>This work</b> |

GCE-Glassy carbon electrode, FTO-Fluorine Doped Tin Oxide Coated Glass, CC- Carbon Cloth.

## References

- 1 S. Anantharaj and S. Kundu, *ACS Energy Lett.*, 2019, **4**, 1260–1264.
- 2 K. Karthick, S. Anantharaj, P. E. Karthik, B. Subramanian and S. Kundu, *Inorg. Chem.*, 2017, **56**, 6734–6745.
- 3 K. Min, M. Hwang, S. E. Shim, D. Lim and S. H. Baeck, *Chem. Eng. J.*, 2021, **424**, 130400.
- 4 Y. Ma, M. Zha, Y. Dong, L. Li and G. Hu, *Mater. Res. Express*, 2019, **6**, 115033.
- 5 B. Guo, R. Ma, Z. Li, J. Luo, M. Yang and J. Wang, *Mater. Chem. Front.*, 2020, **4**, 1390–1396.
- 6 C. Wang, H. Shang, J. Li, Y. Wang, H. Xu, C. Wang, J. Guo and Y. Du, *Chem. Eng. J.*, 2021, **420**, 129805.
- 7 A. Karmakar, R. Jayan, A. Das, A. Kalloorkal, M. Islam and S. Kundu, *ACS Appl. Mater. Interfaces*, 2023, **15**, 26928–26938.
- 8 C. Peng, H. Liu, J. Chen, Y. Zhang, L. Zhu, Q. Wu, W. Zou, J. Wang, Z. Fu and Y. Lu, *Appl. Surf. Sci.*, 2021, **544**, 148897.
- 9 B. Y. Guo, X. Y. Zhang, X. Ma, T. S. Chen, Y. Chen, M. L. Wen, J. F. Qin, J. Nan, Y. M. Chai and B. Dong, *Int. J. Hydrogen Energy*, 2020, **45**, 9575–9582.
- 10 J. Y. Xie, R. Y. Fan, J. Y. Fu, Y. N. Zhen, M. X. Li, H. J. Liu, Y. Ma, F. L. Wang, Y. M. Chai and B. Dong, *Int. J. Hydrogen Energy*, 2021, **6**, 1–9.
- 11 R. Madhu, A. Karmakar, S. Kumaravel, S. S. Sankar, K. Bera, S. Nagappan, H. N. Dhandapani and S. Kundu, *ACS Appl. Mater. Interfaces*, 2022, **14**, 1077–1091.
- 12 N. Wang, P. Ou, R. K. Miao, Y. Chang, Z. Wang, S. F. Hung, J. Abed, A. Ozden, H. Y. Chen, H. L. Wu, J. E. Huang, D. Zhou, W. Ni, L. Fan, Y. Yan, T. Peng, D. Sinton, Y. Liu, H. Liang and E. H. Sargent, *J. Am. Chem. Soc.*, 2023, **14**, 7829–7836.
- 13 K. L. Yan, J. Q. Chi, J. Y. Xie, B. Dong, Z. Z. Liu, W. K. Gao, J. H. Lin, Y. M. Chai and C.

- G. Liu, *Renew. Energy*, 2018, **119**, 54–61.
- 14 J. Huang, H. Sheng, R. D. Ross, J. Han, X. Wang, B. Song and S. Jin, *Nat. Commun.*, 2021, **12**, 3036.
- 15 R. Ge, L. Li, J. Su, Y. Lin, Z. Tian and L. Chen, *Adv. Energy Mater.*, 2019, **9**, 1–9.
- 16 J. Kim, P. C. Shih, Y. Qin, Z. Al-Bardan, C. J. Sun and H. Yang, *Angew. Chemie - Int. Ed.*, 2018, **57**, 13877–13881.
- 17 K. L. Yan, J. F. Qin, J. H. Lin, B. Dong, J. Q. Chi, Z. Z. Liu, F. N. Dai, Y. M. Chai and C. G. Liu, *J. Mater. Chem. A*, 2018, **6**, 5678–5686.
- 18 Y. Qin, T. Yu, S. Deng, X. Y. Zhou, D. Lin, Q. Zhang, Z. Jin, D. Zhang, Y. B. He, H. J. Qiu, L. He, F. Kang, K. Li and T. Y. Zhang, *Nat. Commun.*, 2022, **13**, 3784.
- 19 Y. Tian, S. Wang, E. Velasco, Y. Yang, L. Cao, L. Zhang, X. Li, Y. Lin, Q. Zhang and L. Chen, *iScience*, 2020, **23**, 100756.
